# Supplementary material
Source: PubMed Central journal article supplement (PMC11072358)

## SUPPLEMENTARY INFORMATION

### Supplementary table legends

**Table S1.** List of proteins included in the siRNA screen.

**Table S2.** Sequences for all siRNAs included in the siRNA screen.

**Table S3.** Proteins that were affected ( $p \leq 0.01$ ; fold change  $\geq 1.4$ ) in sEVs released from cells depleted of SNAP29 compared to control cells. Blue color indicates downregulated proteins, pink color indicates upregulated proteins;  $FDR \leq 0.1$ . Four independent analysis were performed.

### Supplementary figure legends

**Fig. S1.** Size distribution of sEVs shown as number of particles normalized by total number of particles for each condition. PC-3 cells were depleted for STX2 (A), STX3 (B), STX18 (C), VAMP8 (D), and (E) SNAP29, before sEVs were isolated by sequential centrifugation and their size was measured by NTA. The data shows mean + SEM from 3-4 independent experiments.

**Fig. S2.** Confocal microscopy analysis of SNAP29 in MCF7, MDA-MB-231 and Caco2 cell. SNAP29 labelling (green) in (A) MCF7, (B) MDA-MB-231 and (C) Caco2 cells. In all cases, cells were fixed and permeabilized before incubation with SNAP29 antibody and the corresponding secondary antibodies. Cells were then washed and mounted with ProLong Gold antifade mounting medium containing DAPI to stain the nuclei (blue) and imaged using a Nikon ECLIPSE Ti2-E confocal spinning disk microscope. Images were captured with a x100 objective. Scale bars are indicated (10  $\mu\text{m}$ ).

**Fig. S3.** Confocal microscopy analysis of SNAP29 in control PC-3 cells. (A-C) Cells showing SNAP29 labelling (green), EEA1 (early endosome) labelling (red), and both proteins together. (D-F) Cells showing SNAP29 labelling (green), GM130 (Golgi apparatus) labelling (red), and both proteins together. (G-H) Control cells showing SNAP29 labelling (green), MitoTracker (mitochondria) staining (red), and a combination of both. In all cases, cells were washed and mounted with ProLong Gold antifade mounting medium containing DAPI to stain the nuclei (blue) and imaged using a Nikon ECLIPSE Ti2-E confocal spinning disk microscope. Images were captured with a x100 objective. Scale bars are indicated (10  $\mu\text{m}$ ).

Table S1. List of proteins included in the siRNA screen.

| Category                                   | Gene Symbol                  | UniprotKB name                                                    |
|--------------------------------------------|------------------------------|-------------------------------------------------------------------|
| <b>SNARE and SNARE-associated proteins</b> | YKT6                         | Synaptobrevin homolog YKT6                                        |
|                                            | SNAP23                       | Synaptosomal-associated protein 23                                |
|                                            | SNAP25                       | Synaptosomal-associated protein 25                                |
|                                            | SNAP29                       | Synaptosomal-associated protein 29                                |
|                                            | BNIP1                        | Vesicle transport protein SEC20                                   |
|                                            | SEC22A                       | Vesicle-trafficking protein SEC22a                                |
|                                            | SEC22B                       | Vesicle-trafficking protein SEC22b                                |
|                                            | SEC22C                       | Vesicle-trafficking protein SEC22c                                |
|                                            | VAMP7                        | Vesicle-associated membrane protein 7                             |
|                                            | VAMP8                        | Vesicle-associated membrane protein 8                             |
|                                            | STX2                         | Syntaxin-2                                                        |
|                                            | STX3                         | Syntaxin-3                                                        |
|                                            | STX4                         | Syntaxin-4                                                        |
|                                            | STX7                         | Syntaxin-7                                                        |
|                                            | STX16                        | Syntaxin-16                                                       |
|                                            | STX18                        | Syntaxin-18                                                       |
|                                            | STXBP3                       | Syntaxin-binding protein 3                                        |
|                                            | USE1                         | Vesicle transport protein USE1                                    |
|                                            | VTI1B                        | Vesicle transport through interaction with t-SNAREs homolog 1B    |
|                                            | GOSR1                        | Golgi SNAP receptor complex member 1                              |
|                                            | GOSR2                        | Golgi SNAP receptor complex member 2                              |
|                                            | BET1                         | BET1 homolog                                                      |
|                                            | BET1L                        | BET1-like protein                                                 |
| SYT1                                       | Synaptotagmin-1              |                                                                   |
| SYTL2                                      | Synaptotagmin-like protein 2 |                                                                   |
| <b>Ras superfamily of small GTPases</b>    | RAB27A                       | Ras-related protein Rab-27A                                       |
|                                            | RAB27B                       | Ras-related protein Rab-27B                                       |
|                                            | CDC42                        | Cell division control protein 42 homolog                          |
|                                            | RHOD                         | Rho-related GTP-binding protein RhoD                              |
|                                            | RHOF                         | Rho-related GTP-binding protein RhoF                              |
|                                            | RND3                         | Rho-related GTP-binding protein RhoE                              |
|                                            | ARL13B                       | ADP-ribosylation factor-like protein 13B                          |
|                                            | ARL15                        | ADP-ribosylation factor-like protein 15                           |
| <b>Phospholipases</b>                      | PLCB4                        | 1-phosphatidylinositol 4,5-bisphosphate phosphodiesterase beta-4  |
|                                            | PLCD1                        | 1-phosphatidylinositol 4,5-bisphosphate phosphodiesterase delta-1 |
|                                            | PLCD3                        | 1-phosphatidylinositol 4,5-bisphosphate phosphodiesterase delta-3 |
|                                            | PLD1                         | Phospholipase D1                                                  |
|                                            | PLD2                         | Phospholipase D2                                                  |
| <b>Tight junctions</b>                     | CLDN1                        | Claudin-1                                                         |
|                                            | CLDN3                        | Claudin-2                                                         |
|                                            | CLDN4                        | Claudin-3                                                         |
| <b>Phospholipid scramblases</b>            | PLSCR1                       | Phospholipid scramblase 1                                         |
|                                            | PLSCR3                       | Phospholipid scramblase 3                                         |
| <b>Sortin nexins</b>                       | SNX11                        | Sorting nexin-11                                                  |
|                                            | SNX17                        | Sorting nexin-17                                                  |
| <b>Others</b>                              | GRASP                        | GRP1-associated scaffold protein                                  |
|                                            | GORASP1                      | Golgi reassembly-stacking protein 1                               |
|                                            | GORASP2                      | Golgi reassembly-stacking protein 2                               |
|                                            | SDCBP                        | Syntenin-1                                                        |

Table S2. Sequences for all siRNAs included in the siRNA screen.

| Duplex Catalog Number | Gene Symbol | GENE ID | Gene Accession | GI Number | Sequence             |
|-----------------------|-------------|---------|----------------|-----------|----------------------|
| J-004667-05           | RAB27A      | 5873    | NM_183236      | 34485710  | CCAUAGCACUCGCAGAGAA  |
| J-004667-06           | RAB27A      | 5873    | NM_183236      | 34485710  | CAGGAGAGGUUUCGUAGCU  |
| J-004667-07           | RAB27A      | 5873    | NM_183236      | 34485710  | UCACAACAGUGGGCAUUGA  |
| J-004667-08           | RAB27A      | 5873    | NM_183236      | 34485710  | CUACGGAUCAGUUAAUGUGA |
| J-004228-05           | RAB27B      | 5874    | NM_004163      | 21314628  | GGAACUGGCUGACAAAUAU  |
| J-004228-06           | RAB27B      | 5874    | NM_004163      | 21314628  | GCAAAUGCUUAUUGUGAAA  |
| J-004228-07           | RAB27B      | 5874    | NM_004163      | 21314628  | GGAAGUCAAUGAACGGCAA  |
| J-004228-08           | RAB27B      | 5874    | NM_004163      | 21314628  | UGAAACAAGUGCAGCAACU  |
| J-019237-09           | YKT6        | 10652   | NM_006555      | 34304384  | GCUCAAAAGCCGCAUACGAU |
| J-019237-10           | YKT6        | 10652   | NM_006555      | 34304384  | CUAUAAAACUGCCCGGAAA  |
| J-019237-11           | YKT6        | 10652   | NM_006555      | 34304384  | AUACCAGAACCCACGAGAA  |
| J-019237-12           | YKT6        | 10652   | NM_006555      | 34304384  | CUAAAAGUGCAGGCCGAACU |
| J-011959-06           | GOSR1       | 9527    | NM_001007025   | 55770857  | CAGAAGAACUGAGCUAUUU  |
| J-011959-07           | GOSR1       | 9527    | NM_001007025   | 55770857  | GAAGUCAAUUCACAGCAA   |
| J-011959-08           | GOSR1       | 9527    | NM_001007025   | 55770857  | GGGAGAAUCUUAUGGGAUC  |
| J-011959-09           | GOSR1       | 9527    | NM_001007025   | 55770857  | GAGACAUUAUUGCAGGAUUA |
| J-010980-06           | GOSR2       | 9570    | NM_054022      | 60499002  | ACGAAUCACUGCAGUUUAA  |
| J-010980-07           | GOSR2       | 9570    | NM_054022      | 60499002  | CGAAAUCCAAGCAAGCAUA  |
| J-010980-08           | GOSR2       | 9570    | NM_054022      | 60499002  | GAUCCAGUCUUGCAUGGGA  |
| J-010980-09           | GOSR2       | 9570    | NM_054022      | 60499002  | UUJAGAUGGGCAAAUUAUU  |
| J-017545-05           | SNAP23      | 8773    | NM_130798      | 18765730  | UAACAGAACUCAACAAAUG  |
| J-017545-06           | SNAP23      | 8773    | NM_130798      | 18765730  | CAACUAAAACCGCAUAGAAG |
| J-017545-07           | SNAP23      | 8773    | NM_130798      | 18765730  | GAAACUCAUUGACAGCUAA  |
| J-017545-08           | SNAP23      | 8773    | NM_130798      | 18765730  | ACAGAGAUUCGUUAUUGAUU |
| J-011394-09           | SNAP25      | 6616    | NM_130811      | 18765734  | CUGGAAAGCACCCGUCGUA  |
| J-011394-10           | SNAP25      | 6616    | NM_130811      | 18765734  | CAGAAUCGCCAGAUCGACA  |
| J-011394-11           | SNAP25      | 6616    | NM_130811      | 18765734  | GUGUAGUGGACGAACGGGA  |
| J-011394-12           | SNAP25      | 6616    | NM_130811      | 18765734  | ACAAAUGAUGCCCGAGAAA  |
| J-011935-05           | SNAP29      | 9342    | NM_004782      | 18765736  | GAAGCUAUAAGUACAAGUA  |
| J-011935-06           | SNAP29      | 9342    | NM_004782      | 18765736  | GACAAGAUGGACCAAGAUU  |
| J-011935-07           | SNAP29      | 9342    | NM_004782      | 18765736  | CAACCAAAGUGGACAAGUU  |
| J-011935-08           | SNAP29      | 9342    | NM_004782      | 18765736  | UUJAGAAAGCUGGAUAUAC  |
| J-012479-09           | SEC22A      | 26984   | NM_012430      | 14591918  | GGGCAAGGCUCCCGAUUUAU |
| J-012479-10           | SEC22A      | 26984   | NM_012430      | 14591918  | AGGACCAAGCAGCGAUUAU  |
| J-012479-11           | SEC22A      | 26984   | NM_012430      | 14591918  | GAACAUCACAAGUAUCGAA  |
| J-012479-12           | SEC22A      | 26984   | NM_012430      | 14591918  | CAAAUUUCCAUGUGCGAAC  |
| J-011963-05           | SEC22B      | 9554    | NM_004892      | 34335289  | AAUAGUGUAUGUCCGAUUC  |
| J-011963-06           | SEC22B      | 9554    | NM_004892      | 34335289  | GCUAAGCAACUCUUUCGAA  |
| J-011963-07           | SEC22B      | 9554    | NM_004892      | 34335289  | CCUAGAAGAUUUGCACUCA  |
| J-011963-08           | SEC22B      | 9554    | NM_004892      | 34335289  | GAAGCACUCUCAGCAUUGG  |
| J-011911-09           | SEC22C      | 9117    | NM_032970      | 21536309  | CCUCCAGGCCAUACGCUUU  |
| J-011911-10           | SEC22C      | 9117    | NM_032970      | 21536309  | CCGAAUGGAACAGUGACA   |
| J-011911-11           | SEC22C      | 9117    | NM_032970      | 21536309  | GGUUGUGACUUUAGUAUAC  |
| J-011911-12           | SEC22C      | 9117    | NM_032970      | 21536309  | GUAUCCAGGUCGAGGUUCU  |
| J-020864-05           | VAMP7       | 6845    | NM_005638      | 27545446  | GUACUCACAUGGCAAUUAU  |
| J-020864-06           | VAMP7       | 6845    | NM_005638      | 27545446  | GAACGUUCCCGAGCCUUUA  |
| J-020864-07           | VAMP7       | 6845    | NM_005638      | 27545446  | CGAGUUCUCAAGUGUCUUA  |
| J-020864-08           | VAMP7       | 6845    | NM_005638      | 27545446  | GCCAAGACAGGAUUGUAUA  |
| J-013503-05           | VAMP8       | 8673    | NM_003761      | 14043025  | CCACUGGUGCCUUCUCUUA  |
| J-013503-06           | VAMP8       | 8673    | NM_003761      | 14043025  | GUCCUUAUCUGCGUGAUUG  |
| J-013503-07           | VAMP8       | 8673    | NM_003761      | 14043025  | GAAAUGAUCGUGUGCGGAA  |
| J-013503-08           | VAMP8       | 8673    | NM_003761      | 14043025  | GGGAAAACUUGGAACAUCU  |
| J-021379-05           | STX2        | 2054    | NM_001980      | 37577286  | UAGACAAGCUCUCAUUGAA  |
| J-021379-06           | STX2        | 2054    | NM_001980      | 37577286  | CUUGUGAUCCUUGGAAUUA  |
| J-021379-07           | STX2        | 2054    | NM_001980      | 37577286  | UAGCAACCAUAUCCCAAGA  |
| J-021379-08           | STX2        | 2054    | NM_001980      | 37577286  | GUUAAAAGGCUAUUGAACAA |

|             |         |        |              |           |                      |
|-------------|---------|--------|--------------|-----------|----------------------|
| J-015401-05 | STX3    | 6809   | NM_004177    | 34147491  | GAUCAUUGACUCACAGAUU  |
| J-015401-06 | STX3    | 6809   | NM_004177    | 34147491  | AAGAAACUCUACAGUAUCA  |
| J-015401-07 | STX3    | 6809   | NM_004177    | 34147491  | AGGGUGAGAUGUUAGAUAA  |
| J-015401-08 | STX3    | 6809   | NM_004177    | 34147491  | AAACUCGGCUUAACAUUGA  |
| J-016256-05 | STX4    | 6810   | NM_004604    | 34147603  | GGACAAUUCGGCAGACUAU  |
| J-016256-06 | STX4    | 6810   | NM_004604    | 34147603  | GCGUCACAGUGGUUGGAUA  |
| J-016256-07 | STX4    | 6810   | NM_004604    | 34147603  | GCGAGGUGUUUGUGUCCAA  |
| J-016256-08 | STX4    | 6810   | NM_004604    | 34147603  | CGUCAACACAAGAAUGAGA  |
| J-019551-09 | STX7    | 8417   | NM_003569    | 4507294   | GAGUUUGUUGCUCGAGUAA  |
| J-019551-10 | STX7    | 8417   | NM_003569    | 4507294   | CAGCAGAUUAUCAGCGCAA  |
| J-019551-11 | STX7    | 8417   | NM_003569    | 4507294   | UGUCAUUGGAGUUGCGAUU  |
| J-019551-12 | STX7    | 8417   | NM_003569    | 4507294   | GGAGCACACUGUCGCACUA  |
| J-019468-09 | STX16   | 8675   | NM_001001434 | 47778944  | GU AUGAUGUUGGCCGGAUU |
| J-019468-10 | STX16   | 8675   | NM_001001434 | 47778944  | AAAUUUCACCAGCGAUU    |
| J-019468-11 | STX16   | 8675   | NM_001001434 | 47778944  | GCUAAUUGAGAGAGCGUUA  |
| J-019468-12 | STX16   | 8675   | NM_001001434 | 47778944  | AGUAGGACUUCUUCGUUUA  |
| J-020624-09 | STX18   | 53407  | NM_016930    | 39725935  | CUGUCUGAGUCAACGAAUA  |
| J-020624-10 | STX18   | 53407  | NM_016930    | 39725935  | CAGAGAGCCAUCGAGUUA   |
| J-020624-11 | STX18   | 53407  | NM_016930    | 39725935  | GUUCAGACAGACAGACGUA  |
| J-020624-12 | STX18   | 53407  | NM_016930    | 39725935  | CAAGAGAUUUCACGAAA    |
| J-021121-09 | USE1    | 55850  | NM_018467    | 49574516  | UGAAGGUCCACGCGAGCAA  |
| J-021121-10 | USE1    | 55850  | NM_018467    | 49574516  | GAGCCUGAGAUGGACGUAA  |
| J-021121-11 | USE1    | 55850  | NM_018467    | 49574516  | AGCUAAACCUGGUGCGGCU  |
| J-021121-12 | USE1    | 55850  | NM_018467    | 49574516  | CGAAUCAUGCCUAAACUCA  |
| J-020152-09 | VT1B    | 10490  | NM_006370    | 5454165   | CAAAGUAUUGAACGUUCU   |
| J-020152-10 | VT1B    | 10490  | NM_006370    | 5454165   | GAGCAUAUGAAUCGGCUAC  |
| J-020152-11 | VT1B    | 10490  | NM_006370    | 5454165   | UGGAGGAGGAGCUACGUUA  |
| J-020152-12 | VT1B    | 10490  | NM_006370    | 5454165   | UUGC UAAACUCCAUCGGGA |
| J-012085-09 | BET1    | 10282  | NM_005868    | 83779007  | GGAACUAUGGCUAUGC UAA |
| J-012085-10 | BET1    | 10282  | NM_005868    | 83779007  | GAAACUUAUGUGGGAGAGUA |
| J-012085-11 | BET1    | 10282  | NM_005868    | 83779007  | AAAUJGGCCAUGAAGUUA   |
| J-012085-12 | BET1    | 10282  | NM_005868    | 83779007  | CCUAAUAACCUGUCAGUUU  |
| J-018850-09 | BET1L   | 51272  | NM_016526    | 34365798  | UCCCUUAGGACUCGGAUUU  |
| J-018850-10 | BET1L   | 51272  | NM_016526    | 34365798  | GCGGGUGGGUGGUCAAAUC  |
| J-018850-11 | BET1L   | 51272  | NM_016526    | 34365798  | AGUGUGAGAGCCAGGGUUA  |
| J-018850-12 | BET1L   | 51272  | NM_016526    | 34365798  | CCUUCUAGCUUGCUGUAA   |
| J-011222-05 | BNIP1   | 662    | NM_013978    | 153946402 | GGUCCUCUAUAUUGUGAAA  |
| J-011222-06 | BNIP1   | 662    | NM_013978    | 153946402 | ACAGUUGCGUCACAGAAUA  |
| J-011222-08 | BNIP1   | 662    | NM_013978    | 153946402 | GGAUUAUCGUGAUUGUUCA  |
| J-011222-18 | BNIP1   | 662    | NM_013978    | 153946402 | UCUCAUCUUCUUGCUCUA   |
| J-018892-05 | GRASP   | 160622 | NM_181711    | 32171220  | GGAGAGUACAGGUCCUAA   |
| J-018892-06 | GRASP   | 160622 | NM_181711    | 32171220  | CAUCCGGCAUCGAGAGAUU  |
| J-018892-07 | GRASP   | 160622 | NM_181711    | 32171220  | UAACCAGACCUUCGGCUUU  |
| J-018892-08 | GRASP   | 160622 | NM_181711    | 32171220  | CAGCGUCAUUGGCCUGAAU  |
| J-005057-05 | CDC42   | 998    | NM_044472    | 16357471  | CGGAAUAUGUACCGACUGU  |
| J-005057-06 | CDC42   | 998    | NM_044472    | 16357471  | GCAGUCACAGUUAUGAUUG  |
| J-005057-07 | CDC42   | 998    | NM_044472    | 16357471  | GAUGACCCUCUACUAUUG   |
| J-005057-08 | CDC42   | 998    | NM_044472    | 16357471  | CUGCAGGGCAAGAGGAUUA  |
| J-013510-05 | GORASP1 | 64689  | NM_031899    | 29826292  | GAUCUCUACCACAGAAUAA  |
| J-013510-06 | GORASP1 | 64689  | NM_031899    | 29826292  | GAGGACUUCUUUACGCUCA  |
| J-013510-07 | GORASP1 | 64689  | NM_031899    | 29826292  | GAACUGACCACCACAGCUG  |
| J-013510-08 | GORASP1 | 64689  | NM_031899    | 29826292  | CUGGAGGUGUCAAUAUGA   |
| J-019045-05 | GORASP2 | 26003  | NM_015530    | 29826293  | CCACACAGUGAUUAUAUAA  |
| J-019045-06 | GORASP2 | 26003  | NM_015530    | 29826293  | GCAGAUACAGUCAUGAAUG  |
| J-019045-07 | GORASP2 | 26003  | NM_015530    | 29826293  | CAUJGGAUUUGGUUAUUG   |
| J-019045-08 | GORASP2 | 26003  | NM_015530    | 29826293  | GGAGUGAGCAUUCGUUUCU  |

|             |        |        |           |           |                      |
|-------------|--------|--------|-----------|-----------|----------------------|
| J-017365-09 | ARL13B | 200894 | NM_144996 | 33598957  | CUUUAAGUGUACAUCGUAA  |
| J-017365-10 | ARL13B | 200894 | NM_144996 | 33598957  | UGAACGAGUGCGAAAAUUA  |
| J-017365-11 | ARL13B | 200894 | NM_144996 | 33598957  | AGACACAAGGCCAGGUUAA  |
| J-017365-12 | ARL13B | 200894 | NM_144996 | 33598957  | GCUACAUGUUUUGCAAGA   |
| J-020355-09 | ARL15  | 54622  | NM_019087 | 9506652   | CCGAAUAACUGAGGGCGUUU |
| J-020355-10 | ARL15  | 54622  | NM_019087 | 9506652   | GCUGAUAAAUCCGGAAAU   |
| J-020355-11 | ARL15  | 54622  | NM_019087 | 9506652   | CCACAGACUCACACUAUUAU |
| J-020355-12 | ARL15  | 54622  | NM_019087 | 9506652   | GCAUUAACGUCUAGUACAC  |
| J-009594-05 | PLCB4  | 5332   | NM_182797 | 33469938  | GGUCAGAAAUGAUCAAUAC  |
| J-009594-06 | PLCB4  | 5332   | NM_182797 | 33469938  | GAUCAAUCAUACACAACUUA |
| J-009594-07 | PLCB4  | 5332   | NM_182797 | 33469938  | CCACUGACACCAUACGUAA  |
| J-009594-08 | PLCB4  | 5332   | NM_182797 | 33469938  | CAAGGAAACUGCAUUUGUC  |
| J-009149-05 | PLCD1  | 5333   | NM_006225 | 195972884 | GGAGUUUGCGUUUGAGGUA  |
| J-009149-07 | PLCD1  | 5333   | NM_006225 | 195972884 | UAUGAUGCCUCCUCCAAGA  |
| J-009149-08 | PLCD1  | 5333   | NM_006225 | 195972884 | GGACCAGCGUCAGAAGCUA  |
| J-009149-18 | PLCD1  | 5333   | NM_006225 | 195972884 | CAAUCAUCUACCACGGCUA  |
| J-008649-09 | PLCD3  | 113026 | NM_133373 | 48675819  | UGAACGACAUGUACGCCUA  |
| J-008649-10 | PLCD3  | 113026 | NM_133373 | 48675819  | AAGCAAGGGUACCGCCACA  |
| J-008649-11 | PLCD3  | 113026 | NM_133373 | 48675819  | CCUAUGAGCUCUACGAGAC  |
| J-008649-12 | PLCD3  | 113026 | NM_133373 | 48675819  | GACAGUAGAAUGAGCCUAU  |
| J-017369-09 | CLDN1  | 9076   | NM_021101 | 21536297  | GCAAUAGAAUCGUUCAAGA  |
| J-017369-10 | CLDN1  | 9076   | NM_021101 | 21536297  | GGAAAGACUACGUGUGACA  |
| J-017369-11 | CLDN1  | 9076   | NM_021101 | 21536297  | CACCAAGGCCCUAUCCAAA  |
| J-017369-12 | CLDN1  | 9076   | NM_021101 | 21536297  | GAGGAUGGCUGUCAUUGGG  |
| J-017303-05 | CLDN3  | 1365   | NM_001306 | 21536298  | CCACCAAGGUCGUCUACUC  |
| J-017303-06 | CLDN3  | 1365   | NM_001306 | 21536298  | GGACUACGUCUAAGGGACA  |
| J-017303-07 | CLDN3  | 1365   | NM_001306 | 21536298  | GCAGCAACAUCUACACGUC  |
| J-017303-08 | CLDN3  | 1365   | NM_001306 | 21536298  | CAUCGUGUGCUGCGCGUUG  |
| J-013612-05 | CLDN4  | 1364   | NM_001305 | 34335232  | GCAACUACGUGUAAGGUGC  |
| J-013612-06 | CLDN4  | 1364   | NM_001305 | 34335232  | ACAAUCCGUGGUGGCCUC   |
| J-013612-07 | CLDN4  | 1364   | NM_001305 | 34335232  | CCCACAACAUCUCCAAGA   |
| J-013612-08 | CLDN4  | 1364   | NM_001305 | 34335232  | GGUAAUGGGCAUCGCGCUG  |
| J-009413-05 | PLD1   | 5337   | NM_002662 | 46276864  | CAACAGAGUUUCUUGAUUAU |
| J-009413-06 | PLD1   | 5337   | NM_002662 | 46276864  | GGUAAUCAGUGGAUAAAUAU |
| J-009413-07 | PLD1   | 5337   | NM_002662 | 46276864  | CCAUGGAGGUUUGGACUUA  |
| J-009413-08 | PLD1   | 5337   | NM_002662 | 46276864  | CCGGGUAAUUGUCGUGAUA  |
| J-005064-05 | PLD2   | 5338   | NM_002663 | 20070140  | GGACCGGCCUUUCGAAGAU  |
| J-005064-06 | PLD2   | 5338   | NM_002663 | 20070140  | CAGCAUGGCGGGACUAUUAU |
| J-005064-07 | PLD2   | 5338   | NM_002663 | 20070140  | CAAGGUGGGCGAUGAGAUU  |
| J-005064-08 | PLD2   | 5338   | NM_002663 | 20070140  | ACAUUAUGCUCUAGAGGAA  |
| J-003729-07 | PLSCR1 | 5359   | NM_021105 | 10863876  | UUACAGACGCUGAUAAUUAU |
| J-003729-08 | PLSCR1 | 5359   | NM_021105 | 10863876  | GAUAAUUGGGUCAAGAAG   |
| J-003729-09 | PLSCR1 | 5359   | NM_021105 | 10863876  | CCAAAUCAGCCAGUGUAUA  |
| J-003729-10 | PLSCR1 | 5359   | NM_021105 | 10863876  | GUAGUGGAUUAGUGAAAGU  |
| J-010255-05 | PLSCR3 | 57048  | NM_020360 | 31543416  | GGAGACCUGUAAUCGGUAU  |
| J-010255-06 | PLSCR3 | 57048  | NM_020360 | 31543416  | GCAGAUGACUUUGGCCUAC  |
| J-010255-07 | PLSCR3 | 57048  | NM_020360 | 31543416  | CCACAUUCCUCAUUGACUA  |
| J-010255-08 | PLSCR3 | 57048  | NM_020360 | 31543416  | GGUGAAGACUCGGGAUGAA  |
| J-008940-05 | RHOD   | 29984  | NM_014578 | 17738304  | CGGCUCGGCUCUAGACAA   |
| J-008940-06 | RHOD   | 29984  | NM_014578 | 17738304  | CCACGGUGUUUGAGCGGUA  |
| J-008940-07 | RHOD   | 29984  | NM_014578 | 17738304  | GCAAGAAGGUACCAUCAU   |
| J-008940-08 | RHOD   | 29984  | NM_014578 | 17738304  | GAUUGGAGCCUGUGACCUA  |

|             |        |       |              |          |                     |
|-------------|--------|-------|--------------|----------|---------------------|
| J-007794-06 | RND3   | 390   | NM_005168    | 56676394 | CUACAGUGUUUGAGAAUUA |
| J-007794-07 | RND3   | 390   | NM_005168    | 56676394 | UAGUAGAGCUCUCCAAUCA |
| J-007794-08 | RND3   | 390   | NM_005168    | 56676394 | CAGCAAUCUAUCAUGGAU  |
| J-007794-09 | RND3   | 390   | NM_005168    | 56676394 | GCGGACAGAUGUUAGUACA |
| J-008316-05 | RHOF   | 54509 | NM_019034    | 38016956 | CAUCGGUGUUCGAGAAGUA |
| J-008316-06 | RHOF   | 54509 | NM_019034    | 38016956 | GCAAGACAGACCUGAGGAA |
| J-008316-07 | RHOF   | 54509 | NM_019034    | 38016956 | UCCUGAGGUCACGCAUUU  |
| J-008316-08 | RHOF   | 54509 | NM_019034    | 38016956 | UGAAGAAGGCGCAACGGCA |
| J-013673-09 | SNX11  | 29916 | NM_013323    | 23111025 | GGUGUAGGAUGUCGGAGAA |
| J-013673-10 | SNX11  | 29916 | NM_013323    | 23111025 | CAUUGAGAAGCGACGACAA |
| J-013673-11 | SNX11  | 29916 | NM_013323    | 23111025 | GGAUUUUUGUCCCGAGACC |
| J-013673-12 | SNX11  | 29916 | NM_013323    | 23111025 | GUAUGUAGGACCAGGAGUA |
| J-013427-09 | SNX17  | 9784  | NM_014748    | 23238249 | CAUGCAAGCUGUUCGGCAA |
| J-013427-10 | SNX17  | 9784  | NM_014748    | 23238249 | AUGCGAUGCUGGCGGGUCA |
| J-013427-11 | SNX17  | 9784  | NM_014748    | 23238249 | CUUUAUGCUCAGACGGUAU |
| J-013427-12 | SNX17  | 9784  | NM_014748    | 23238249 | CCAGUGAUGUCCACGGCAA |
| J-020044-05 | SYT1   | 6857  | NM_005639    | 5032138  | GCAUUUUACUUUCAAGGUA |
| J-020044-06 | SYT1   | 6857  | NM_005639    | 5032138  | GGGCACAUCUGAUCCUUAC |
| J-020044-07 | SYT1   | 6857  | NM_005639    | 5032138  | GAUCGUUUCUCUAAGCAUG |
| J-020044-08 | SYT1   | 6857  | NM_005639    | 5032138  | GUAAGAGGCUGAAGAAGAA |
| J-013555-05 | SYTL2  | 54843 | NM_032379    | 46255060 | GAAACUAGCUCUCCAGUAU |
| J-013555-06 | SYTL2  | 54843 | NM_032379    | 46255060 | CAUUUAAGCGCAAUAGUUU |
| J-013555-07 | SYTL2  | 54843 | NM_032379    | 46255060 | UGUAAAGGCCUAUUUGCUA |
| J-013555-08 | SYTL2  | 54843 | NM_032379    | 46255060 | GGACUGGGAUAACAAACAG |
| J-019626-09 | STXBP3 | 6814  | NM_007269    | 6005885  | AGAGUGACAUGAUUCGUAA |
| J-019626-10 | STXBP3 | 6814  | NM_007269    | 6005885  | UCAACAAGGCAAACCGUUA |
| J-019626-11 | STXBP3 | 6814  | NM_007269    | 6005885  | GUAAAUCGGAGAACAAGUA |
| J-019626-12 | STXBP3 | 6814  | NM_007269    | 6005885  | GAAGAUGACCUCUGGGUUA |
| J-008270-05 | SDCBP  | 6386  | NM_001007068 | 55749503 | GGAGAGAAGAUUACCAUGA |
| J-008270-06 | SDCBP  | 6386  | NM_001007068 | 55749503 | GACCAAGUACUUCAGAUCA |
| J-008270-07 | SDCBP  | 6386  | NM_001007068 | 55749503 | GGAUGGUCUUAGAAUUUU  |
| J-008270-08 | SDCBP  | 6386  | NM_001007068 | 55749503 | GCAUUUGACUCUUAAGAUU |

Table S3. Proteins affected ( $p \leq 0.01$ ; fold change  $\geq 1.4$ ) in small EVs released from SNAP29 depleted compared to control cells.

| <b>Protein names</b>                                             | <b>Gene names</b> | <b>p-value</b> | <b>Fold change SNAP29/control</b> |
|------------------------------------------------------------------|-------------------|----------------|-----------------------------------|
| Dedicator of cytokinesis protein 10                              | DOCK10            | 0,00015        | -1,69                             |
| Anion exchange protein                                           | SLC4A7            | 0,00033        | 1,5                               |
| Choline transporter-like protein 2                               | SLC44A2           | 0,00138        | -1,71                             |
| Podocalyxin                                                      | PODXL             | 0,00144        | -1,78                             |
| 1-phosphatidylinositol 4,5-bisphosphate phosphodiesterase beta-4 | PLCB4             | 0,00186        | 1,43                              |
| Anoctamin-1                                                      | ANO1              | 0,00203        | -1,7                              |
| Thioredoxin                                                      | TXN               | 0,00227        | 1,46                              |
| Adenylyl cyclase-associated protein 1                            | CAP1              | 0,00344        | -1,4                              |
| Guanine nucleotide-binding protein subunit alpha-11              | GNA11             | 0,00362        | 1,43                              |
| Annexin A1                                                       | ANXA1             | 0,00409        | 1,49                              |
| G-protein coupled receptor family C group 5 member C             | GPRC5C            | 0,00478        | -1,89                             |
| Na(+)/H(+) exchange regulatory cofactor NHE-RF1                  | SLC9A3R1          | 0,00539        | -1,44                             |
| Ras-related protein R-Ras2                                       | RRAS2             | 0,00684        | -1,5                              |
| Alkaline phosphatase                                             | ALPP              | 0,00690        | -1,5                              |
| F-actin-capping protein subunit beta                             | CAPZB             | 0,00795        | -1,64                             |
| Hyaluronan synthase 3                                            | HAS3              | 0,00866        | 1,78                              |
| Tyrosine-protein kinase transmembrane receptor ROR1              | ROR1              | 0,00881        | -1,76                             |

Supplementary figure 1

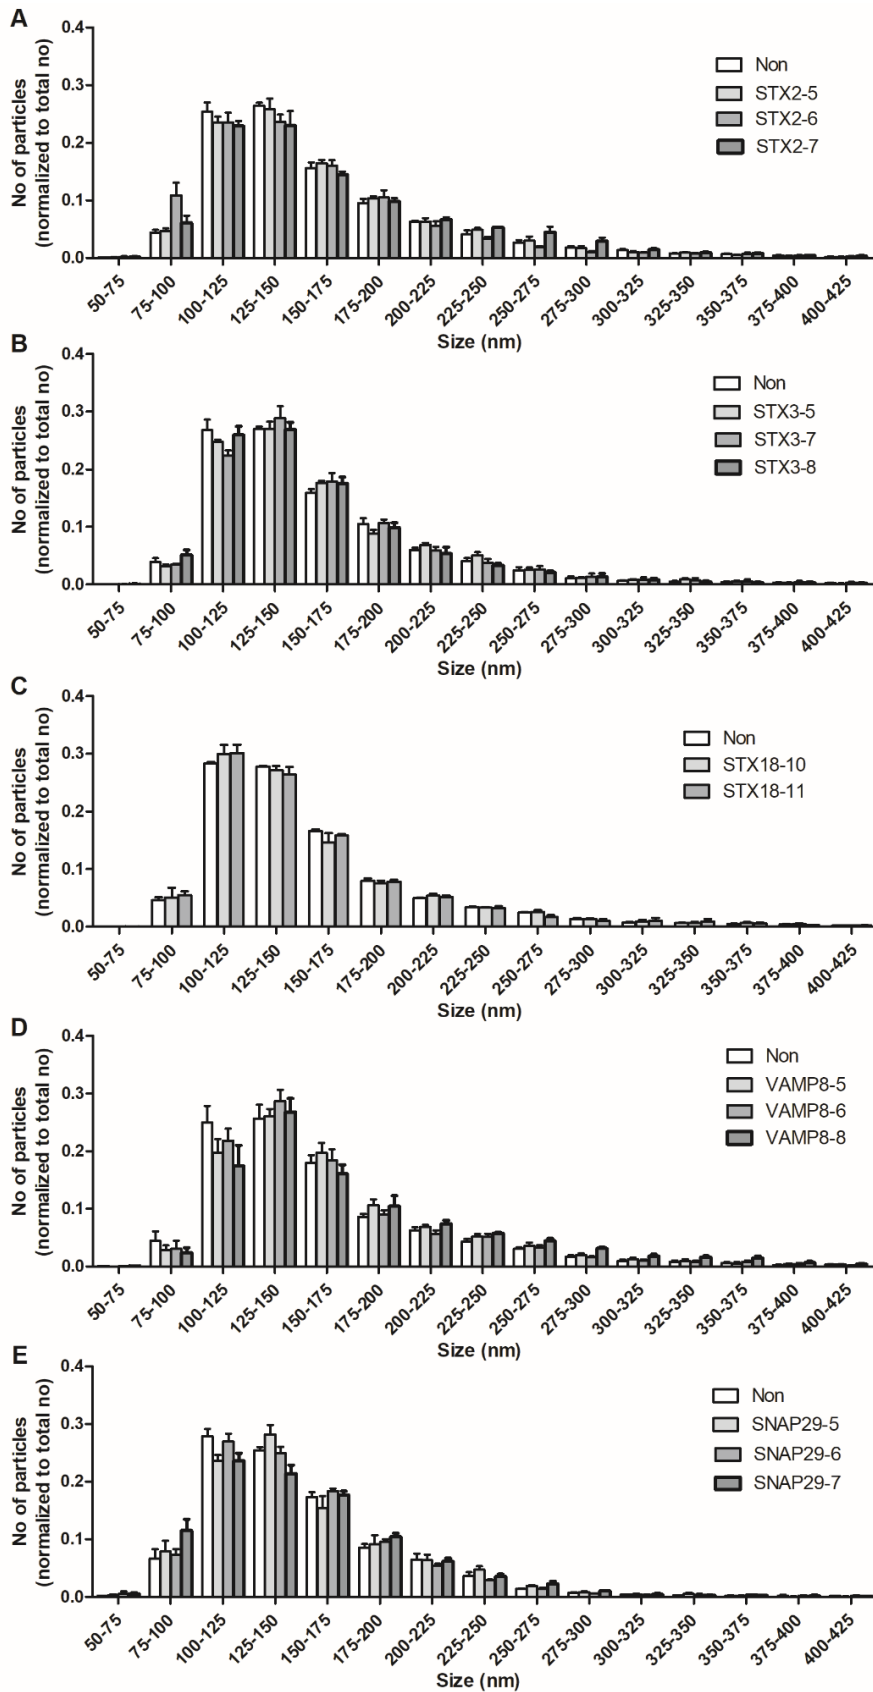



Supplementary figure 2

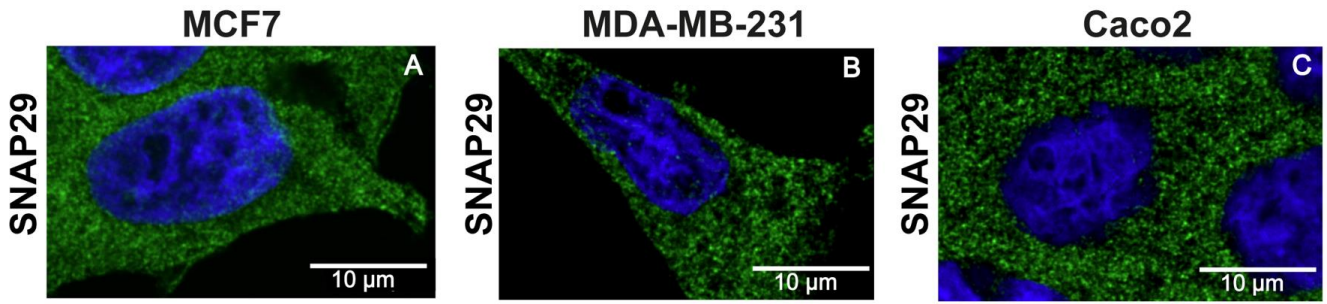

Supplementary figure 3

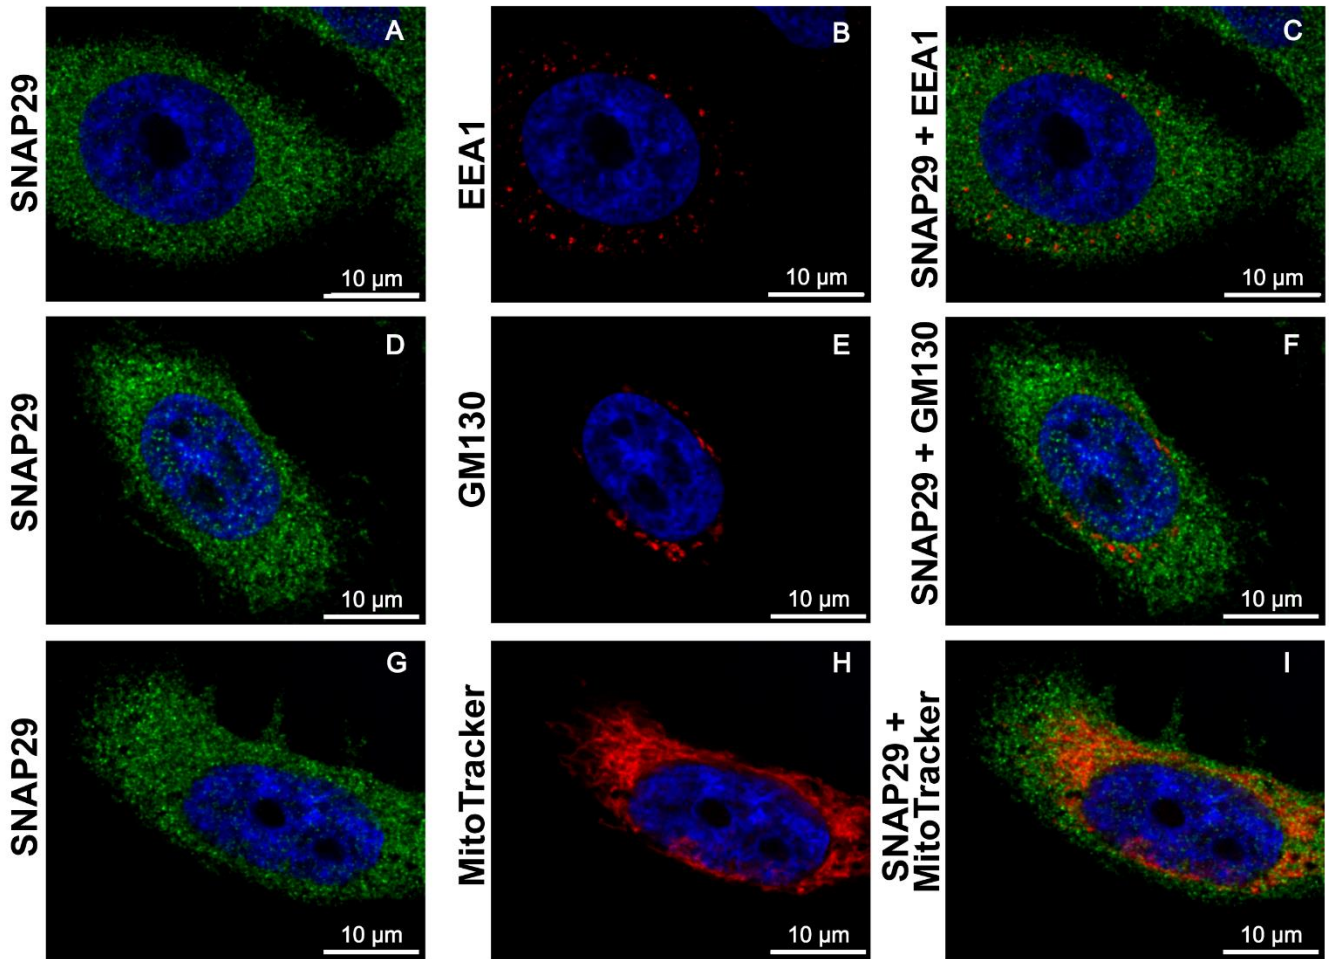

Supplement: 18_2023_4822_MOESM1_ESM.pdf [file 18_2023_4822_MOESM1_ESM.pdf]
